# Supplementary material
Source: publisher figshare collection journal article supplement (https://karger.figshare.com/ndownloader/files/26832473)
Supplement: Supplementary file 1 [file 26832473]

**A Pilot Study of RNA Sequencing to Improve the Diagnostic Yield of Bronchoalveolar Lavage Specimens in Pediatric Allogeneic Hematopoietic Stem Cell Transplant Recipients**

**Supplementary Information**

**Supplementary Figure 1**

Krona plots of other patients samples and paired controls.
